# Supplementary material
Source: PubMed Central journal article supplement (PMC7445433)
Supplement: mmc1.pdf [file mmc1.pdf]

## **Supplemental Information**

### **Structures of Human Antibodies Bound to SARS-CoV-2 Spike Reveal Common Epitopes and Recurrent Features of Antibodies**

**Christopher O. Barnes, Anthony P. West Jr., Kathryn E. Huey-Tubman, Magnus A.G. Hoffmann, Naima G. Sharaf, Pauline R. Hoffman, Nicholas Koranda, Harry B. Gristick, Christian Gaebler, Frauke Muecksch, Julio C. Cetrulo Lorenzi, Shlomo Finkin, Thomas Hägglöf, Arlene Hurley, Katrina G. Millard, Yiska Weisblum, Fabian Schmidt, Theodora Hatzioannou, Paul D. Bieniasz, Marina Caskey, Davide F. Robbiani, Michel C. Nussenzweig, and Pamela J. Bjorkman**

## Supplemental Tables

**Table S1. Crystallographic data collection and refinement statistics for C105 Fab structure (related to Figure 5).**

| <b>PDB ID</b>                            | <b>C105 Fab<br/>(12-I, SSRL)<br/>6XCA</b> |
|------------------------------------------|-------------------------------------------|
| <b>Data collection<sup>a</sup></b>       |                                           |
| Space group                              | I222                                      |
| Unit cell (Å)                            | 67.4, 120.1, 123.3                        |
| $\alpha, \beta, \gamma$ (°)              | 90, 90, 90                                |
| Wavelength (Å)                           | 1.0                                       |
| Resolution (Å)                           | 38.9-1.80 (1.84-1.80)                     |
| Unique Reflections                       | 46,713 (2752)                             |
| Completeness (%)                         | 100 (99.8)                                |
| Redundancy                               | 6.8 (6.5)                                 |
| CC <sub>1/2</sub> (%)                    | 98.8 (54.1)                               |
| $\langle I/\sigma I \rangle$             | 5.7 (1.2)                                 |
| Mosaicity (°)                            | 0.19                                      |
| R <sub>merge</sub> (%)                   | 18.1 (157)                                |
| R <sub>pim</sub> (%)                     | 7.9 (70.5)                                |
| Wilson <i>B</i> -factor                  | 16.8                                      |
| <b>Refinement and Validation</b>         |                                           |
| Resolution (Å)                           | 38.9 - 1.80                               |
| Number of atoms                          |                                           |
| Protein                                  | 3,132                                     |
| Ligand                                   | 10                                        |
| Waters                                   | 477                                       |
| R <sub>work</sub> /R <sub>free</sub> (%) | 18.7/21.6                                 |
| R.m.s. deviations                        |                                           |
| Bond lengths (Å)                         | 0.006                                     |
| Bond angles (°)                          | 0.853                                     |
| MolProbity score                         | 1.29                                      |
| Clashscore (all atom)                    | 4.2                                       |
| Poor rotamers (%)                        | 0                                         |
| Ramachandran plot                        |                                           |
| Favored (%)                              | 97.6                                      |
| Allowed (%)                              | 2.4                                       |
| Disallowed (%)                           | 0                                         |
| Average <i>B</i> -factor (Å)             | 27.1                                      |

<sup>a</sup>Numbers in parentheses correspond to the highest resolution shell

**Table S2. Cryo-EM data collection and refinement statistics for C105-S complex structure (related to Figure 5).**

|                                                 | <b>C105<br/>SARS-CoV-2 S 2P<br/>(state 1)</b> | <b>C105<br/>SARS-CoV-2 S 2P<br/>(state 2)</b> |
|-------------------------------------------------|-----------------------------------------------|-----------------------------------------------|
| <b>PDB</b>                                      | <b>6XCM</b>                                   | <b>6XCN</b>                                   |
| <b>EMD</b>                                      | <b>22127</b>                                  | <b>22128</b>                                  |
| Microscope                                      | Titan Krios                                   | Titan Krios                                   |
| Camera                                          | Gatan K3 Summit                               | Gatan K3 Summit                               |
| Magnification                                   | 105,000x                                      | 105,000x                                      |
| Voltage (kV)                                    | 300                                           | 300                                           |
| Recording mode                                  | counting                                      | counting                                      |
| Dose rate (e <sup>-</sup> /pixel/s)             | 22.1                                          | 22.1                                          |
| Electron dose (e <sup>-</sup> /Å <sup>2</sup> ) | 60                                            | 60                                            |
| Defocus range (μm)                              | 1.0 - 2.5                                     | 1.0 - 2.5                                     |
| Pixel size (Å)                                  | 0.418 (super resolution); 0.836 (binned)      | 0.418 (super resolution); 0.836 (binned)      |
| Micrographs collected                           | 5,940                                         | 5,940                                         |
| Micrographs used                                | 5,336                                         | 5,336                                         |
| Total extracted particles                       | 71,289                                        | 71,289                                        |
| Refined particles                               | 57,710                                        | 14,119                                        |
| Symmetry imposed                                | C1                                            | C3                                            |
| Nominal Resolution (Å)                          |                                               |                                               |
| FSC 0.5 (unmasked/masked)                       | 3.90/3.60                                     | 4.00/3.60                                     |
| FSC 0.143 (unmasked.masked)                     | 3.40/3.20                                     | 3.50/3.40                                     |
| Map sharpening <i>B</i> -factor                 |                                               |                                               |
| <b>Refinement and Validation</b>                |                                               |                                               |
| Number of atoms                                 |                                               |                                               |
| Protein                                         | 25,973                                        | 27,798                                        |
| Ligand                                          | 711                                           | 873                                           |
| MapCC (global/local)                            | 0.86/0.84                                     | 0.87/0.85                                     |
| R.m.s. deviations                               |                                               |                                               |
| Bond lengths (Å)                                | 0.008                                         | 0.011                                         |
| Bond angles (°)                                 | 0.812                                         | 0.893                                         |
| MolProbity score                                | 2.17                                          | 2.26                                          |
| Clashscore (all atom)                           | 13.6                                          | 14.8                                          |
| Poor rotamers (%)                               | 0.04                                          | 1.1                                           |
| Ramachandran plot                               |                                               |                                               |
| Favored (%)                                     | 90.9                                          | 89.9                                          |
| Allowed (%)                                     | 9                                             | 10.1                                          |
| Disallowed (%)                                  | 0.1                                           | 0                                             |

**Table S3. S protein mutations found in different SARS-CoV-2 isolates (related to Figure 6).**

| <b>Mutation</b> | <b>Count</b> | <b>Frequency(%)</b> | <b>Location</b>     |
|-----------------|--------------|---------------------|---------------------|
| D614G           | 9688         | 63.2                | S1 domain D         |
| P1263L          | 115          | 0.7                 | S2 cytoplasmic tail |
| L5F             | 91           | 0.6                 | signal sequence     |
| D936Y           | 88           | 0.6                 | S2 HR1              |
| L54F            | 58           | 0.4                 | S1 domain A         |
| G1124V          | 56           | 0.4                 | S2                  |
| N439K           | 38           | 0.2                 | S1 domain B (RBD)   |
| H49Y            | 35           | 0.2                 | S1 domain A         |
| L18F            | 31           | 0.2                 | S1 domain A         |
| L8V             | 30           | 0.2                 | signal sequence     |
| A831V           | 29           | 0.2                 | S2                  |
| D839Y           | 28           | 0.2                 | S2                  |
| V483A           | 28           | 0.2                 | S1 domain B (RBD)   |
| Q675H           | 24           | 0.2                 | S1 domain D         |
| S50L            | 24           | 0.2                 | S1 domain A         |
| S943P           | 22           | 0.1                 | S2 HR1              |
| A1078S          | 21           | 0.1                 | S2                  |
| R21I            | 19           | 0.1                 | S1 domain A         |
| V367F           | 18           | 0.1                 | S1 domain B (RBD)   |
| T29I            | 18           | 0.1                 | S1 domain A         |

List of SARS-CoV-2 spike mutations with a frequency  $\geq 0.1\%$  in a set of 15335 isolates downloaded from the Global Initiative for Sharing All Influenza Data (GISAID) SARS-CoV-2 sequence database on 5/3/20 (Elbe and Buckland-Merrett, 2017; Shu and McCauley, 2017).

The genomes were processed with the nextstrain augur pipeline

(<https://github.com/nextstrain/augur>) (Hadfield et al., 2018), using MAFFT v7.464 (Kato and Standley, 2013) for sequence alignment and FastTree (Price et al., 2010) to generate a phylogenetic tree. The resulting data were then analyzed with a custom Swift program.
